# Supplementary figures and images for: Co-Infection with Plasmodium vivax and COVID-19 in Thailand
Source: MDPI journal article supplement (doi:10.3390/tropicalmed7080145), 2022-07-22

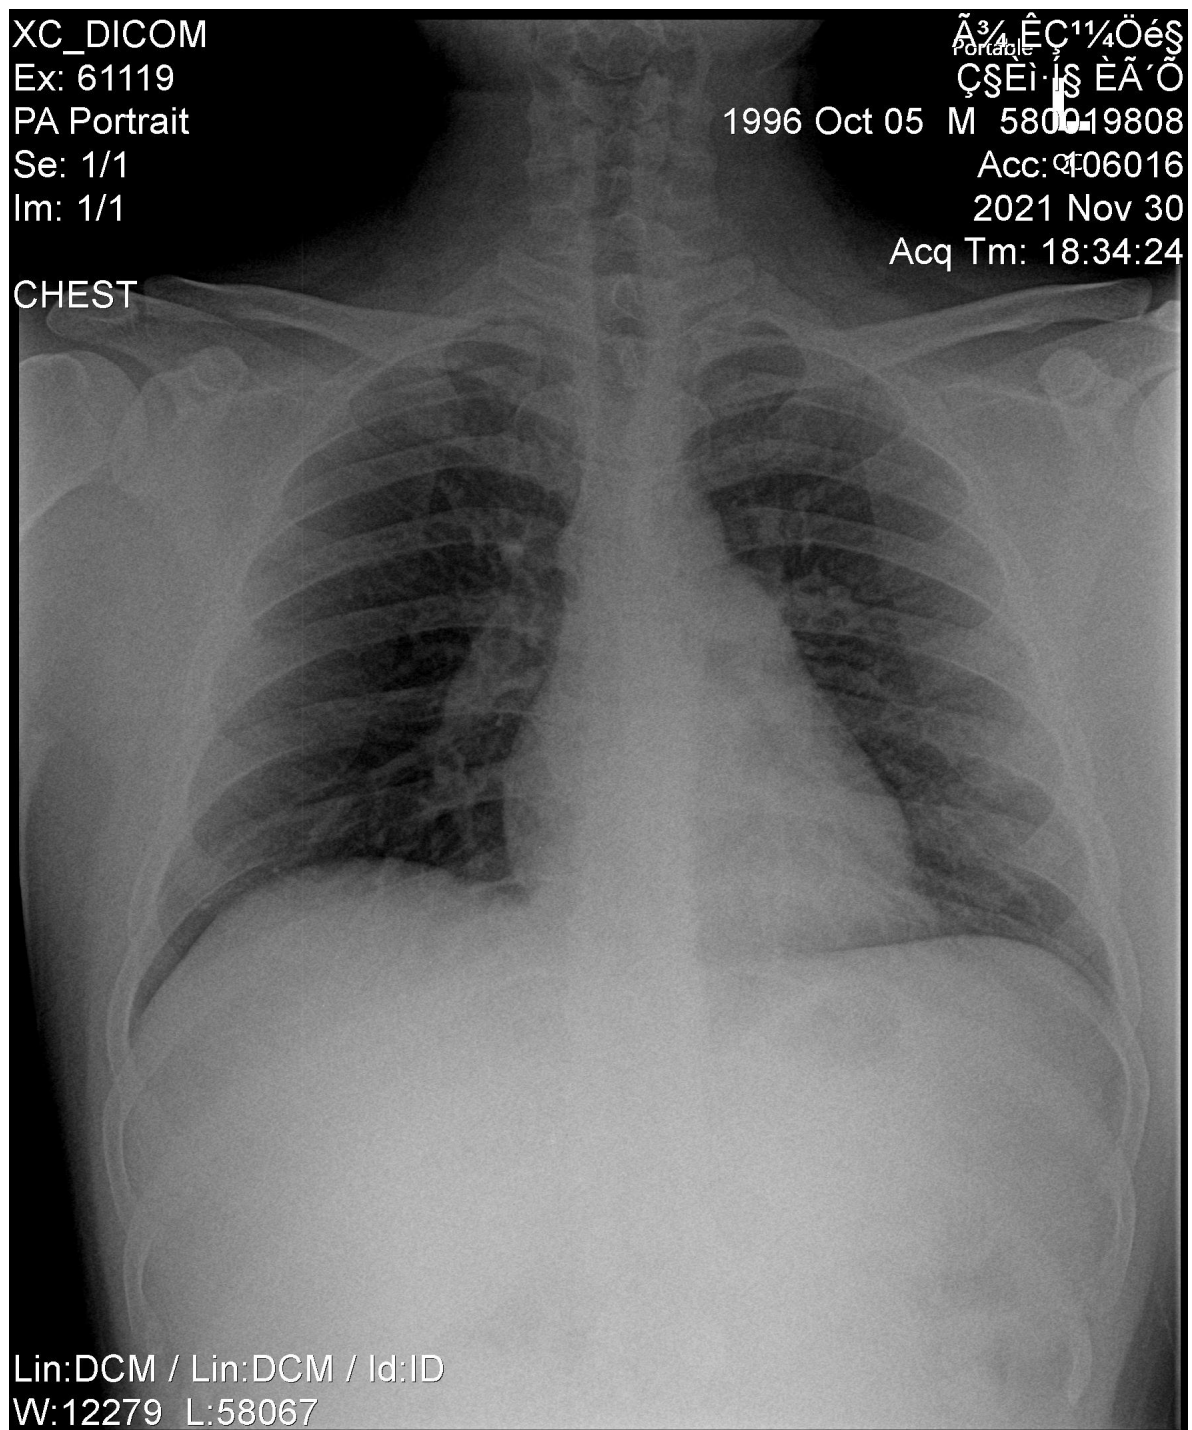

**Figure S1.** Patient's Chest X-ray on the date of admission.

Supplement: s1 [file s1]
